# Supplementary material for: The Sweetpotato BTB-TAZ Protein Gene, IbBT4, Enhances Drought Tolerance in Transgenic Arabidopsis
Source: PubMed Central journal article supplement (PMC7324939; doi:10.3389/fpls.2020.00877), 2020-06-23
Supplement: Data_Sheet_1.pdf [file Data_Sheet_1.pdf]

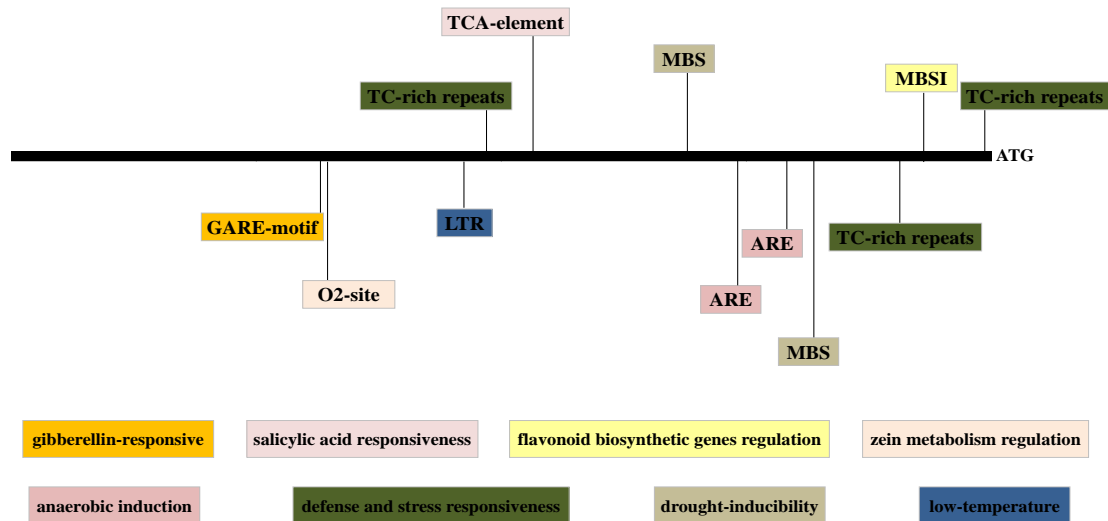

**FIGURE S1** | Promoter of *IbBT4* showing different *cis*-acting regulatory elements associated with abiotic stress responses.

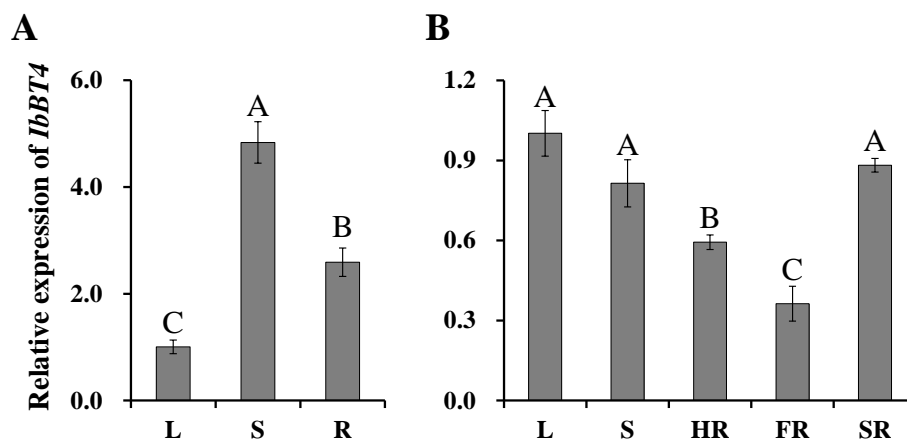

**FIGURE S2** | Expression analysis of *IbBT4* in different tissues of Xushu55-2. The data are presented as the means  $\pm$  SEs ( $n = 3$ ). The different capital letters indicate a significant difference at  $P < 0.01$  according to Student's *t*-test. L: Leaf; S: Stem; HR: Hairy root; FR: Fibrous root; SR: Storage root.

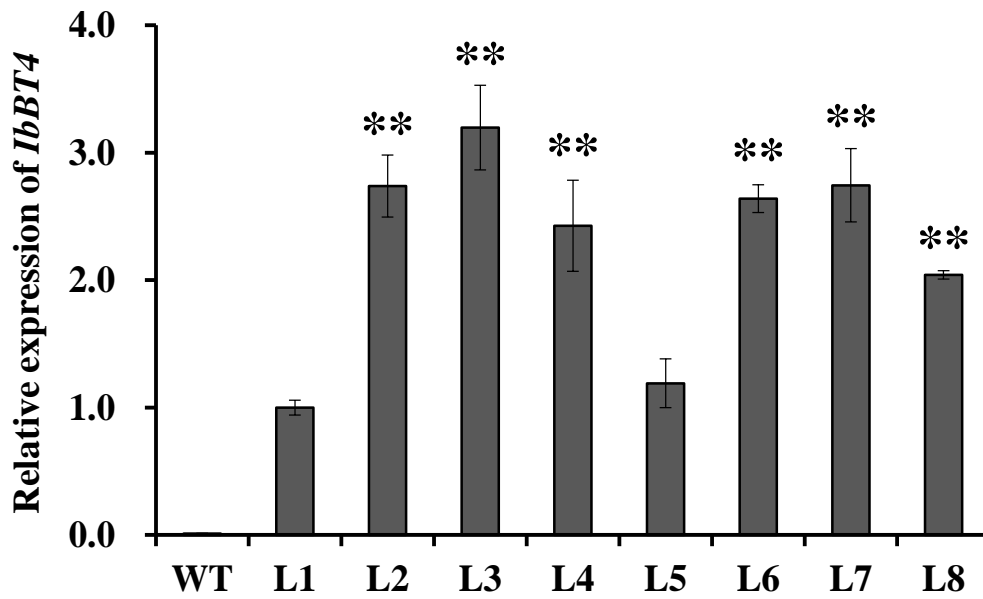

**FIGURE S3** | Expression analysis of *IbBT4* in transgenic *Arabidopsis* plants. *Atactin* was used as an internal control. The data are presented as the means  $\pm$  SEs (n=3). \*\* indicates a significant difference from L1 at  $P < 0.01$  according to Student's *t*-test.

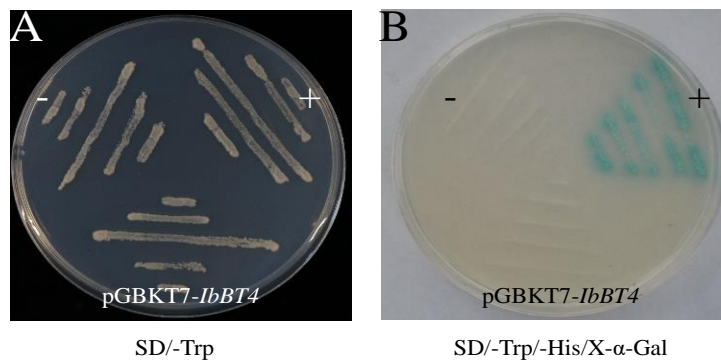

**FIGURE S4** | Transactivation activity assay of *IbBT4* in yeast. **(A)** Transformed yeast cells harbouring different expression vectors were drawn onto SD/-Trp media. pBD (-) and pGAL4 (+) were used as negative and positive controls, respectively. **(B)** Transformed yeast cells harbouring different expression vectors were drawn onto SD/-Trp/-His media supplemented with X- $\alpha$ -Gal. pBD (-) and pGAL4 (+) were used as negative and positive controls, respectively.

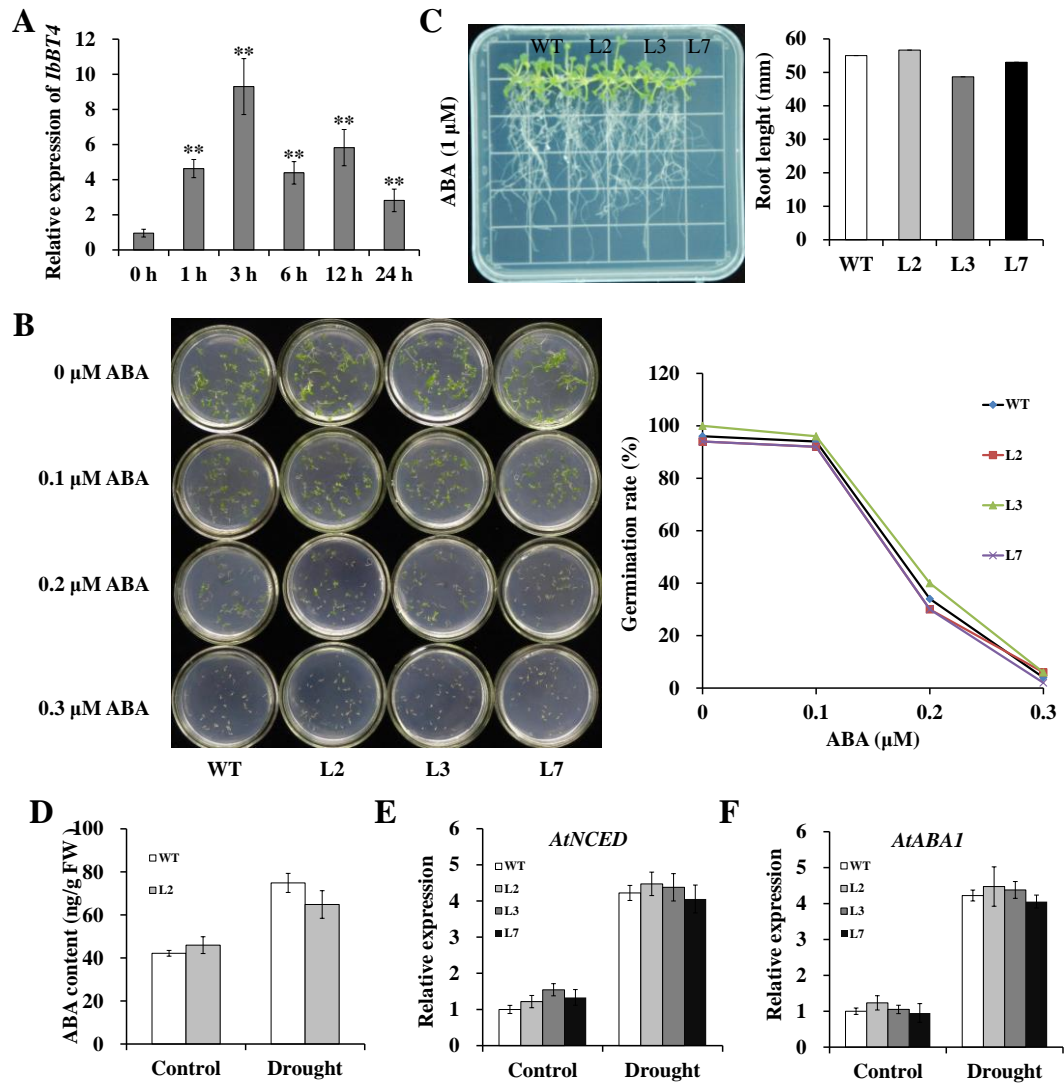

**FIGURE S5** | Analysis of the function of *IbBT4* in the ABA signalling pathway. **(A)** Expression analysis of *IbBT4* in *in vitro*-grown Xushu55-2 plants after different time points (h) in response to 100  $\mu$ M ABA. **(B)** Responses of transgenic *Arabidopsis* and WT seeds sown on 1/2 MS media with 0, 0.1, 0.2 and 0.3  $\mu$ M ABA for 1 week. **(C)** Responses of transgenic *Arabidopsis* and WT seedlings cultured for 2 weeks on 1/2 MS media supplemented with 1  $\mu$ M ABA. **(D)** ABA content in the leaves of transgenic *Arabidopsis* and WT plants grown for 2 weeks under normal conditions followed by 2 weeks of drought stress and for 4 weeks under normal conditions (control), respectively. **(E-F)** Transcript levels of ABA-related genes in the leaves of transgenic *Arabidopsis* and WT plants grown for 2 weeks under normal conditions followed by 2 weeks of drought stress and for 4 weeks under normal conditions (control), respectively. The data are presented as the means  $\pm$  SEs (n = 3). \*\* indicates a significant difference at  $P < 0.01$  according to Student's *t*-test.

**Table S1** Primers used in this study

| Primer name                             | Primer sequence (5'-3')                       |
|-----------------------------------------|-----------------------------------------------|
| Primers for 5'/3' RACE                  |                                               |
| 5GSP1                                   | CGAAGACACACCGAGAACAC                          |
| 5GSP2                                   | GCGAACAAAAATGGAGACAG                          |
| 3GSP1                                   | CGAAACTTTAGGCAGCAGG                           |
| 3GSP2                                   | AGTCCGTTTCCTTCACCGAA                          |
| Primers for 5' - promoter region        |                                               |
| GW1                                     | TTACTCTGCTCCGACGATGA                          |
| GW2                                     | CATCATAGCGGGAAGAATACA                         |
| Pro-F                                   | CTCAACTCCCAAGTCCCATC                          |
| Pro-R                                   | CTTCCGATCCTTAAATTTCTGC                        |
| Primers for vector construction         |                                               |
| IbBT4-F                                 | ATGGGTAAGCTTTCGGATTC                          |
| IbBT4-R                                 | TCATGTTGCTTCAACTGAGAAAAAT                     |
| <i>IbBT4</i> -DW-F ( <i>Pac</i> I )     | CCTTAATTAAATGGGTAAGCTTTCGGATTC                |
| <i>IbBT4</i> -DW-R ( <i>Asc</i> I )     | <u>GGCGCGCC</u> ATGTTGCTTCAACTGAGAAAAAT       |
| <i>IbBT4</i> -OS-F( <i>Xba</i> I )      | GCTCTAGAAATGGGTAAGCTTTCGGATTC                 |
| <i>IbBT4</i> -OS-R( <i>Pst</i> I )      | AACTGCAGTGTTGCTTCAACTGAGAAAAAT                |
| pBD-F- <i>Nde</i> I                     | <u>GGAATTC</u> ATGGGTAAGCTTTCGGATTC           |
| pBD-R- <i>Sal</i> II                    | AACTGCAGTCATGTTGCTTCAACTGAGAAAAAT             |
| <i>IbBEE</i> -AD-F( <i>Nde</i> I )      | GGAATTC <u>GAAATTC</u> ATGCTTCGCTGCGCGC       |
| <i>IbBEE</i> -AD-F( <i>Bam</i> H I )    | CGGGATCCTCACTTTCCCAACCTTGCAGC                 |
| <i>AtBEE</i> -AD-F( <i>Nde</i> I )      | GGAATTC <u>GAAATTC</u> ATGGACTTGTCTGTACTTGATA |
| <i>AtBEE</i> -AD-F( <i>Bam</i> H I )    | CGGGATCCTTACTTGAGGCTGAAGAAATTGG               |
| CE-IbBEE-F( <i>Asc</i> I)               | <u>GGCGCGCC</u> ATGCTTCGCTGCGCGC              |
| CE-IbBEE-R( <i>Kpn</i> I)               | GGGGTACCCTTTCCCAACCTTGCAGC                    |
| CE-AtBEE-F( <i>Asc</i> I)               | <u>GGCGCGCC</u> ATGGACTTGTCTGTACTTGATAGG      |
| CE-AtBEE-R( <i>Kpn</i> I)               | GGGGTACCCTTGAGGCTGAAGAAATTGG                  |
| NE-IbBT4-F( <i>Asc</i> I)               | <u>GGCGCGCC</u> ATGGGTAAGCTTTCGGATTC          |
| NE-IbBT4-R( <i>Kpn</i> I)               | GGGGTACCCTGTTGCTTCAACTGAGAAAAAT               |
| Primers for transformant identification |                                               |
| pSuper-1300-F                           | GACGCCATTTCGCTTTTCA                           |

pSuper-1300-R

TGAACTTGTGGCCGTTTACGTC

---

Primers for qRT-PCR

---

|                     |                              |
|---------------------|------------------------------|
| <i>Ibactin</i> -F   | AGCAGCATGAAGATTAAGGTTGTAGCAC |
| <i>Ibactin</i> -R   | TGGAAAATTAGAAGCACTTCCTGTGAAC |
| <i>IbBT4</i> -F     | CCGATTATGAAAGCCATGTTGAG      |
| <i>IbBT4</i> -R     | TACGAATGCGACAGCACCAGTAA      |
| <i>Atactin</i> -F   | GCACCCTGTTCTTCTTACCGA        |
| <i>Atactin</i> -R   | AGTAAGGTCACGTCCAGCAAGG       |
| <i>AtDWF4</i> -F    | CCGTACACCGCCACAA             |
| <i>AtDWF4</i> -R    | GAATCTATTAAGTCCAGCATCAG      |
| <i>AtCPD</i> -F     | GCTGATCGGAGCTTACAAAAC        |
| <i>AtCPD</i> -R     | AAATCGTCGGTTCACCAAAA         |
| <i>AtDET2</i> -F    | CACCAACCGCCGTCCTT            |
| <i>AtDET2</i> -R    | CGGTGGAGATACGGTGGGAC         |
| <i>AtROT3</i> -F    | AACTTCATCGCTTGTGGTTATT       |
| <i>AtROT3</i> -R    | TTGGTGTCCCTATTATGTTCGT       |
| <i>AtCYP90D1</i> -F | TTTATCATCATCGTCATCTCA        |
| <i>AtCYP90D1</i> -R | TTTGGTCCGTGACTCTGG           |
| <i>AtBR6ox1</i> -F  | AAACCAAAGACTCCGATACGG        |
| <i>AtBR6ox1</i> -R  | CGATTGTGGGTAACCAGGAA         |
| <i>AtBR6ox2</i> -F  | ACCAAAGACTAAGATATGGGAGT      |
| <i>AtBR6ox2</i> -R  | AAGCATAGATTGCGGGTAA          |
| <i>AtBR11</i> -F    | CTCTCCTGTCTCTCACCGGA         |
| <i>AtBR11</i> -R    | GCACCGGAGATTGAATTCGC         |
| <i>AtBIN2</i> -F    | AGATGCCTGCTGCTGTAGTTG        |
| <i>AtBIN2</i> -R    | CCACGGTTTCTCCAGTCTCC         |
| <i>AtBZR1</i> -F    | ATGGTGGCATTCTTCTTCTC         |
| <i>AtBZR1</i> -R    | GCAACGGTTTCGGGTTCTT          |
| <i>AtBES1</i> -F    | CCCAAACCATTGCCTACTTG         |
| <i>AtBES1</i> -R    | GGTGCAGACACCGCATAAAA         |
| <i>AtBR6ox1</i> -F  | AAACCAAAGACTCCGATACGG        |
| <i>AtBR6ox1</i> -R  | CGATTGTGGGTAACCAGGAA         |
| <i>AtBR6ox2</i> -F  | ACCAAAGACTAAGATATGGGAGT      |

|                    |                            |
|--------------------|----------------------------|
| <i>AtBR6ox2</i> -R | AAGCATAGATTGCGGGTAA        |
| <i>AtSOD</i> -F    | ATGAGAAGTTCTATGAAGAG       |
| <i>AtSOD</i> -R    | GTCTTTATGTAATCTGGT         |
| <i>AtGPX</i> -F    | ATGGCGACGAAGGAACCAG        |
| <i>AtGPX</i> -R    | ATCGCCGAAGATTCCCCATT       |
| <i>AtPOD</i> -F    | TCCGGGAGCACACCATTGG        |
| <i>AtPOD</i> -R    | TGGTCGGAATTCAACAG          |
| <i>AtCAT</i> -F    | GCAACTACCCCCGAGTGGAAA      |
| <i>AtCAT</i> -R    | TG TTCAGAACCAAGCGACCA      |
| <i>AtNCED</i> -F   | AGAAGCAGGGCAAATAACAAG      |
| <i>AtNCED</i> -R   | CCGTCGCCGTACCTAAACTC       |
| <i>AtABA1</i> -F   | TACTTGGGGTAAAGGGCGTG       |
| <i>AtABA1</i> -R   | CAAAGCACCCCTGCAATAACT      |
| <i>IbBEE</i> -F    | GAGGAAGATAAGAAATGGGAAGGAGA |
| <i>IbBEE</i> -R    | ATGGCTGTCGGTGGCTTGG        |

---
